# Supplementary material for: Assessment of Subjective Well-Being in a Cohort of University Students and Staff Members: Association with Physical Activity and Outdoor Leisure Time during the COVID-19 Pandemic
Source: MDPI journal article supplement (doi:10.3390/ijerph19084787), 2022-04-14
Supplement: s1 [file s1]

**Supplementary Table S1.** Correlation of 9-item SWB and energy levels with sport practice, physical activity in leisure time and time spent in nature.

|               | Sport practice | Physical activity in leisure time | Time spent in nature |
|---------------|----------------|-----------------------------------|----------------------|
| 9-item SWB    | 0.149***       | 0.160***                          | 0.225***             |
| Energy levels | 0.222***       | 0.236***                          | 0.243***             |

Pearson and Spearman correlation analyses were performed to examine the correlations of 9-item SWB and energy levels with sport practice, PA in leisure time, and time spent in nature. Note: \*\*\*  $p < 0.001$ .
